# Supplementary material
Source: Research Square preprint supplement (doi:10.21203/rs.3.rs-9295735/v1)
Supplement: Supplementary file 1 [file 241a499e4d745a6932be36ef.docx]

Supplementary Material

# Authors:

George Altman (https://orcid.org/0000-0002-4184-2963) 1,
Thomas Spain (https://orcid.org/0009-0002-0023-0976) 2,
Marc Y Henrion (https://orcid.org/0000-0003-1242-839X ) 3,4,

Aidan Flatt (<https://orcid.org/0009-0002-0023-0976>) 1,
David A Singleton (https://orcid.org/0000-0002-1980-5410) 1,

Roberto Vivancos (https://orcid.org/0000-0002-8203-8867) 5,6,7,8,

Valerie Decraene (https://orcid.org/0000-0001-6936-7263) 5,7,

Nigel A. Cunliffe (<https://orcid.org/0000-0002-5449-4988>) 1,7
Neil French (https://orcid.org/0000-0003-4814-8293) 1,8*,
Daniel Hungerford (https://orcid.org/0000-0002-9770-0163) 1,7*

1. Department of Clinical Infection, Microbiology and Immunology, Institute of Infection, Veterinary and Ecological Sciences, University of Liverpool, Liverpool, UK
2. Department of Health Data Science, Institute of Population Health, University of Liverpool, Liverpool, UK
3. Malawi Liverpool Wellcome Research Programme, Blantyre, Malawi,
4. Department of Clinical Sciences, Liverpool School of Tropical Medicine, Liverpool, UK
5. Field Services, UK Health Security Agency, Liverpool, UK
6. Warwick Medical School, University of Warwick, Coventry, UK
7. National Institute for Health and Care Research Health Protection Research Unit in Gastrointestinal Infections, University of Liverpool, Liverpool, UK
8. National Institute for Health and Care Research Health Protection Research Unit in Emerging and Zoonotic Infections, University of Liverpool, Liverpool, UK

* Joint senior authors

Correspondence to: Daniel Hungerford d.hungerford@liverpool.ac.uk

Table of Contents

[Authors: 1](#_Toc225968500)

[Medical and product codes used in CPRD 2](#_Toc225968501)

[Medcodes 2](#_Toc225968502)

[Prodcodes 3](#_Toc225968503)

[RECORD statement 9](#_Toc225968504)

# Medical and product codes used in CPRD

## Medcodes

| **Variable** | **MedCodes** |
| --- | --- |
| PCV Vaccination | "14079781000006114","14055901000006119", "1488400017", "459245012", "405281000000118", "1010021000006118", "1136151000000116", "1788051000006113", "22068011", "924191000006111", "226891000000115", "454175013", "13899031000006117", "754011000000118", "13995871000006115", "6166601000006112", "6610611000006110", "405301000000117", "1010031000006115", "13974341000006110", "2137511000000112", "405321000000114", "1010041000006113" |
| Rotavirus vaccination | "2535217016", "2245021000000115", "2244981000000119", "2245061000000111","1656541000006118","1986621000006117","1986611000006113","2245061000000111" |
| AGE medcode | "186116005", "69776003", "36789003", "236063005", "26006005", "26006005", "266451002", "274081004", "36188001", "721681005", "312109000", "75375008", "274080003", "57725006", "18081009", "18081009", "18081009", "186117001", "423590009", "5891000119102", "5891000119102", "266081001", "266081001", "25374005", "18081009", "398570005", "43240000", "33687004", "33687004", "713186008", "46799006", "111939009", "18081009", "711167005", "86615009", "74621002", "111839008", "25374005", "12463005", "25374005", "57419008", "12463005", "25374005", "1240571000000101", "1240571000000101", "57419008", "111939009", "236061007", "240332005", "308119005", "111817006", "19213003", "19213003", "19213003", "12463005", "19213003", "19213003", "111839008", "12574004", "12574004", "240376003", "240376003", "25374005", "12463005", "12463005", "36188001", "423590009", "423590009", "423590009", "197011006", "197011006", "42338000", "186105003", "36188001", "36188001", "36188001", "1087691000000104", "39963006", "39963006",  "71583005", "71583005", "11840006", "186225008", "15284007", "39306006", "240376003", "186225008", "38420005", "7444001", "12137005", "186272008", "12137005", "75375008", "111843007", "111843007", "111843007", "24789006", "415822001", "111843007", "74621002", "36188001", "25374005", "36188001", "111910009", "111910009", "26826005", "50227004", "27908001", "111910009", "111910009", "240661004", "240661004", "75119003", "65095005", "55023005", "400086005", "20958005", "186134009", "4298009", "266073002",  "66107000", "312108008", "300359004", "71419002", "398565003", "272044004", "59253004", "63650001", "63650001", "81020007", "63650001", "70014009", "370518000", "79099006", "240370009", "62315008", "62315008", "249519007", "275297005", "266078006", "398384001", "267060006", "267060006", "422400008", "4834000", "445152004", "70880006", "32580004", "186150001", "266079003", "266079003", "30140009", "240354007", "240355008", "240353001", "240352006", "168316002", "165351006", "300359004", "75258004",  "75258004", "19894004", "866121000000105", "715852004", "421429008", "267045008", "267045008", "128398001", "10679007", "58265007", "20547008", "20547008", "39341005", "715852004", "128398001", "55184003", "266071000", "266071000", "266071000", "67915005", "47375003", "47375003", "398032003", "16932000", "170517007", "170518002", "240357000", "66107000", "47375003", "302231008", "645911000000105", "66107000", "266071000", "89933001", "302231008", "85904008", "76623002", "71085009", "51254007", "85904008",  "8579004", "186136006", "186136006", "186137002", "186138007", "89933001", "89933001", "266078006", "300358007", "71299003", "302229004", "302231008", "77645007", "6803002", "2523007", "449083008", "302231008", "269935002", "449083008", "43612004", "85729005", "4298009", "39104002", "266071000", "84622004", "266077001", "168318001", "168317006", "307811009", "168319009", "307811009", "168316002", "313336000", "165334004", "439597005", "300359004", "866211000000107", "866231000000104", "42359007",  "197017005", "197018000", "186090001", "4834000", "186090001", "75953000", "81159000", "286870008", "286870008", "78420004", "300359004", "422400008", "300359004", "765480005", "249497008", "422400008", "422587007", "16932000", "249493007", "8579004", "84480002", "66107000", "63650001", "266071000", "66107000", "312108008", "266071000", "89933001", "302231008", "89933001", "302231008") |

## Prodcodes

| **Variable** | **Prodcode** |
| --- | --- |
| Rotavirus vaccination | "3922441000033114", "5989741000033114", "12349441000033117" |
| PCV Vaccination | "2289341000033114", "3907141000033111", "5411641000033116", "9809541000033117", "11964841000033115", "5438441000033118",  "12706141000033114", "2182541000033114", "1094441000033111" |
| Antibiotics | "3980541000033119", "23141000033112", "23241000033117", "37241000033112", "2186941000033119", "53141000033111", "49941000033113", "53041000033112", "49841000033117", "55641000033117", "46141000033118", "55741000033114", "45641000033115", "56841000033114", "45441000033117", "56941000033118", "45541000033116", "3079841000033112", "3079641000033111", "3080041000033117", "13707941000033117", "3079341000033115", "3079141000033118", "3079441000033114", "3079741000033119", "3080141000033118", "3079941000033116", "3079241000033113", "3079541000033110", "52841000033110", "55941000033112", "48441000033113", "44041000033113", "48541000033114", "56041000033119", "53941000033113", "44141000033112", "48641000033110", "52041000033115", "44441000033116", "52141000033116", "44541000033115", "50641000033110", "94841000033111", "94641000033110", "94741000033118", "93141000033115", "94941000033115", "95041000033115", "92641000033117", "92741000033114", "2890341000033112", "5454341000033115", "97541000033116", "97641000033115", "97741000033112", "98441000033116", "96941000033113", "3955441000033115", "8884841000033119", "1572841000033112", "97841000033119", "97941000033110", "98041000033113", "5836141000033117", "2617541000033112", "115841000033118", "115941000033114", "104041000033114", "116041000033116", "13418641000033115", "5369941000033115", "1769641000033110", "130941000033113", "153341000033118", "153241000033111", "4898641000033111", "4290441000033118", "4290641000033116", "4290941000033111", "5836241000033112", "230941000033110", "230941000033110", "230741000033112", "230741000033112", "220441000033115", "220441000033115", "231741000033119", "231741000033119", "230841000033119", "230841000033119", "227741000033114", "227741000033114", "219741000033111", "219741000033111", "231041000033117", "231541000033110", "220541000033119", "231641000033111", "3084441000033119", "5747941000033119", "3084041000033111", "3084241000033115", "3084541000033118", "4373141000033119", "3084141000033110", "3084341000033113", "3084641000033117", "230041000033114", "232741000033113", "12395841000033112", "224041000033118", "225741000033119", "225841000033112", "224141000033119", "226541000033116", "223641000033110", "223741000033118", "233141000033119", "228441000033118", "3084941000033112", "3084741000033114", "3085141000033111", "3084841000033116", "3085041000033112", "223441000033113", "223541000033114", "8127041000033116", "224341000033116", "224341000033116", "226041000033114", "226041000033114", "12195641000033118", "12195641000033118", "225941000033116", "225941000033116", "1581541000033112", "1581541000033112", "226141000033113", "226141000033113", "10745441000033113", "10740641000033117", "222741000033111", "222941000033114", "222841000033118", "224541000033111", "228941000033111", "235441000033111", "230141000033113", "226741000033112", "233041000033118", "226841000033119", "232341000033112", "220941000033113", "235141000033115", "232441000033118", "221041000033115", "235241000033110", "232541000033117", "241541000033111", "237441000033116", "3956741000033117", "3956841000033110", "255041000033118", "257041000033112", "259341000033118", "255641000033112", "5052541000033110", "254241000033110", "253741000033119", "4039741000033115", "260241000033112", "1582941000033113", "254341000033117", "253841000033112", "4039841000033113", "258841000033116", "259041000033115", "259441000033112", "255341000033116", "253541000033110", "259641000033114", "1582841000033117", "253641000033111", "258741000033114", "258941000033112", "254441000033111", "254541000033112", "275741000033118", "275841000033111", "275941000033115", "4823141000033118", "6030241000033111", "3838541000033117", "278241000033118", "3838641000033116", "282141000033118", "3838741000033113", "287441000033111", "1830541000033112", "277841000033115", "274641000033111", "285341000033110", "3838841000033115", "3838941000033111", "3839041000033119", "261541000033115", "8243241000033115", "3873041000033118", "13419541000033111", "3873141000033119", "13419641000033112", "262741000033117", "8495241000033113", "330541000033110", "5697041000033116", "366941000033113", "317741000033113", "370041000033115", "5697141000033117", "367041000033114", "367541000033116", "330441000033114", "370141000033116", "1594141000033117", "368341000033110", "294741000033111", "329941000033113", "373541000033118", "366841000033117", "373441000033119", "289441000033119", "333441000033116", "11716741000033114", "11716841000033116", "8491841000033110", "8491841000033110", "3152441000033111", "3152441000033111", "3086641000033114", "3086641000033114", "11716641000033117", "3086741000033117", "3086741000033117", "3086841000033110", "3086841000033110", "372641000033113", "372641000033113", "368841000033118", "368841000033118", "8491941000033119", "8491941000033119", "371541000033119", "371541000033119", "332341000033119", "332341000033119", "368641000033119", "368641000033119", "2945541000033110", "2945541000033110", "332441000033113", "332441000033113", "3216441000033116", "1769741000033118", "386341000033112", "3892241000033112", "3993841000033110", "396041000033114", "396141000033113", "3873241000033114", "3873341000033116", "12208041000033119", "12208041000033119", "3892141000033117", "3993741000033117", "416041000033117", "9702841000033114", "415841000033119", "415941000033110", "429741000033115", "7871941000033113", "460341000033118", "460341000033118", "460441000033112", "460441000033112", "433941000033116", "433941000033116", "452341000033110", "452341000033110", "4609741000033119", "4609641000033111", "3089341000033112", "3089441000033118", "3089541000033117", "5150141000033114", "1603241000033119", "7871241000033116", "2104341000033112", "2104241000033119", "5150241000033119", "2839241000033117", "534141000033113", "539541000033115", "539641000033119", "535241000033119", "535441000033118", "534241000033118", "1924941000033118", "537641000033110", "537441000033113", "537741000033118", "537541000033114", "538841000033112", "537841000033111", "537941000033115", "536941000033117", "13300741000033118", "540141000033115", "537241000033112", "536141000033119", "537341000033119", "6427141000033111", "10220241000033110", "6427941000033113", "4456141000033116", "563241000033113", "8243841000033116", "7871841000033117", "592041000033111", "592241000033115", "593041000033119", "593141000033115", "591941000033117", "2923641000033112", "592341000033113", "584241000033113", "577941000033118", "584341000033115", "592441000033119", "578041000033115", "584441000033114", "579741000033114", "579541000033118", "590241000033119", "5292941000033116", "587341000033112", "578141000033116", "587941000033111", "4086141000033119", "5293041000033114", "590441000033118", "12395741000033119", "578241000033111", "587841000033115", "9302741000033115", "9995341000033116", "600141000033115", "600141000033115", "600341000033117", "600341000033117", "600241000033110", "600241000033110", "1610741000033119", "1610741000033119", "600441000033111", "600441000033111", "1610641000033111", "1610641000033111", "9302641000033112", "599941000033116", "9995241000033114", "8946441000033114", "618941000033118", "618641000033113", "619141000033114", "618541000033112", "619241000033119", "618841000033114", "625941000033118", "620241000033118", "625841000033114", "620341000033111", "11603941000033110", "11604041000033112", "10495541000033111", "633541000033113", "630841000033116", "631241000033110", "631041000033119", "3956941000033119", "631441000033111", "753141000033112", "753141000033112", "2839341000033110", "799941000033117", "799941000033117", "800041000033111", "800041000033111", "802741000033110", "796841000033118", "803341000033118", "802841000033117", "796941000033114", "803441000033112", "803141000033116", "797641000033116", "803241000033111", "797741000033113", "800341000033113", "2890541000033117", "2676941000033112", "805741000033118", "805441000033113", "805341000033119", "804841000033112", "805141000033117", "1830641000033113", "804941000033116", "808441000033117", "808541000033116", "820141000033117", "11524841000033115", "11524841000033115", "1626241000033115", "1626241000033115", "1626341000033113", "1626341000033113", "6427241000033116", "8618641000033117", "1626141000033110", "1626141000033110", "2729041000033112", "2586741000033112", "2586841000033119", "854441000033117", "863441000033113", "857841000033111", "857941000033115", "857741000033118", "860041000033112", "867741000033114", "877941000033117", "878041000033119", "883441000033111", "883441000033111", "883641000033113", "883641000033113", "13303841000033117", "882841000033116", "882841000033116", "883041000033119", "883041000033119", "892741000033113", "892841000033115", "2923441000033110", "891941000033116", "893041000033118", "897941000033114", "893141000033119", "898041000033112", "892441000033118", "899441000033113", "2923541000033111", "12356041000033116", "911041000033113", "918641000033112", "918741000033115", "916041000033119", "906241000033112", "916141000033115", "918841000033113", "906341000033119", "918941000033117", "936041000033112", "928541000033118", "936141000033111", "933741000033116", "925241000033114", "2890241000033119", "5454241000033113", "13444441000033118", "8246541000033111", "953941000033117", "954741000033117", "961941000033110", "961341000033111", "3857741000033113", "964941000033112", "965141000033111", "1659541000033110", "967441000033110", "967541000033111", "967941000033117", "971641000033114", "975441000033114", "5997141000033116", "5997241000033111", "974441000033110", "968141000033115", "975541000033110", "976441000033117", "986441000033114", "1002541000033118", "9290241000033118", "1002641000033117", "3914441000033113", "1017041000033111", "1015141000033118", "12583741000033117", "1026741000033115", "1026541000033111", "1025441000033118", "1063241000033111", "1044041000033111", "1044141000033110", "1051841000033116", "1063341000033118", "2637141000033110", "1076141000033115", "3923541000033116", "1081941000033116", "1076241000033110", "3923641000033115", "5006741000033114", "5006841000033116", "1091741000033118", "1118041000033115", "1118041000033115", "1120741000033113", "1120741000033113", "2746541000033112", "2888741000033112", "2888741000033112", "6171841000033114", "6171841000033114", "11525041000033111", "11525041000033111", "2290941000033119", "2291041000033112", "2290741000033117", "2290841000033110", "13135041000033113", "13135341000033110", "1671741000033118", "1671841000033111", "5976341000033110", "8262441000033118", "1180641000033110", "1180841000033111", "1180741000033118", "1183741000033110", "2993941000033113", "3855741000033118", "1275241000033112", "1267541000033110", "1271441000033111", "1275741000033118", "1272641000033118", "1275641000033110", "10335241000033110", "10335541000033112", "1364841000033111", "2958441000033116", "9302541000033111", "3105141000033117", "5975741000033118", "3105241000033112", "3104641000033111", "6035241000033119", "1398741000033113", "1393841000033111", "8262541000033117", "1406741000033116", "1406841000033114", "1409341000033111", "9290341000033111", "1407541000033110", "7677841000033115", "7677941000033111", "1698741000033115", "1698741000033115", "1698841000033113", "1698841000033113", "1698641000033112", "1698641000033112", "1405141000033110", "1405241000033115", "10335141000033115", "10335441000033111", "1420841000033116", "1420941000033112", "9686641000033116", "2676841000033116", "1421041000033119", "2130541000033115", "1427741000033113", "1428041000033114", "1414641000033119", "3923141000033113", "1436941000033111", "1441341000033115", "1444641000033114", "1924841000033114", "6454241000033111", "11717241000033117", "1447041000033113", "9730341000033114", "9730341000033114", "6454141000033116", "4898541000033110", "1924741000033116", "1447141000033112", "1446541000033118", "1446541000033118", "1471141000033119", "1460641000033114", "1471241000033114", "1467541000033114", "1472641000033117", "1472741000033114", "1472841000033116", "1472941000033112", "3923241000033118", "9118041000033113", "2955441000033112", "1495641000033119", "1494941000033113", "1496041000033116", "13303941000033113", "1501341000033118", "2800741000033110", "3865941000033110", "1498741000033117", "1498841000033110", "1501541000033113", "1498941000033119", "8945541000033116", "2800841000033117", "11717341000033110", "1507841000033116", "1506041000033114", "1511941000033116", "1506141000033113", "1507941000033112", "9686841000033115", "1523841000033118", "1514941000033119", "1515041000033119", "1705841000033113", "2193041000033114", "11809941000033116", "6430341000033112", "12208241000033110", "12195741000033110", "12195741000033110", "8884941000033110", "10740741000033114", "10745541000033114", "1554741000033113", "1554841000033115", "1554941000033111", "8127141000033117", "1558241000033114", "1557041000033117", "1557341000033115", "1556241000033110", "1557141000033118", "1553141000033111", "1713741000033116", "2729141000033111", "2586941000033110", "2587041000033111" |

# RECORD statement

**RECORD statement – checklist of items, extended from the STROBE statement, that should be reported in observational studies using routinely collected health data.**

|  | **Item**  **No.** | **STROBE items** | **Location in**  **manuscript where items are reported** | **RECORD items** | **Location in**  **manuscript**  **where items are reported** |
| --- | --- | --- | --- | --- | --- |
| **Title and abstract** | | | | | |
|  | 1 | (a) Indicate the study’s design with a commonly used term in the title or the abstract (b)  Provide in the abstract an  informative and balanced  summary of what was done and what was found | Title and abstract | RECORD 1.1: The type of data used should be specified in the title or abstract. When possible, the name of the databases used should be included.  RECORD 1.2: If applicable, the geographic region and timeframe within which the study took place should be reported in the title or abstract.  RECORD 1.3: If linkage between databases was conducted for the study, this should be clearly stated in the title or abstract. | 1.1 - Abstract specifies CPRD  1.2 - Methods section on abstract includes UK and time frame 2010-2020  1.3 - No linkage so NA |
| **Introduction** | | | | | |
| Background  rationale | 2 | Explain the scientific  background and rationale for the investigation being reported | Included in background |  |  |
| Objectives | 3 | State specific objectives,  including any prespecified hypotheses | Included in last paragraph of background |  |  |
| **Methods** | | | | | |
| Study Design | 4 | Present key elements of study design early in the paper | 1st paragraph of methods - study design and data source |  |  |
| Setting | 5 | Describe the setting, locations, and relevant dates, including periods of recruitment, exposure, follow-up, and data collection | Included in the study population section of methods |  |  |

| Participants | 6 | *(a) Cohort study*- Give the eligibility criteria, and the  sources and methods of selection of participants. Describe  methods of follow-up  *Case-control study*- Give the eligibility criteria, and the  sources and methods of case ascertainment and control  selection. Give the rationale for the choice of cases and controls *Cross-sectional study*- Give the eligibility criteria, and the  sources and methods of selection of participants  *(b) Cohort study*- For matched studies, give matching criteria and number of exposed and unexposed  *Case-control study*- For  matched studies, give matching criteria and the number of  controls per case | 6(a) Included in table 1  6(b) not matched so NA | RECORD 6.1: The methods of study population selection (such as codes or algorithms used to identify subjects) should be listed in detail. If this is not possible, an explanation should be provided.  RECORD 6.2: Any validation studies of the codes or algorithms used to select the population should be  referenced. If validation was conducted for this study and not published elsewhere, detailed methods and results should be provided.  RECORD 6.3: If the study involved linkage of databases, consider use of a flow diagram or other graphical display to demonstrate the data linkage process, including the number of individuals with linked data at each stage. | 6.1 - Included in study selection  6.2 - included in outcomes IID2 and IID3  6.3 NA |
| --- | --- | --- | --- | --- | --- |
| Variables | 7 | Clearly define all outcomes, exposures, predictors, potential confounders, and effect  modifiers. Give diagnostic  criteria, if applicable. | Covered in the Covariates and Outcomes section of methods | RECORD 7.1: A complete list of codes and algorithms used to classify exposures, outcomes, confounders, and effect modifiers should be provided. If these cannot be reported, an  explanation should be provided. | Included in linked github depository <https://github.com/GeorgeAltman/Rotavirus-abx> |
| Data sources/  measurement | 8 | For each variable of interest, give sources of data and details of methods of assessment  (measurement).  Describe comparability of  assessment methods if there is more than one group | Included in covariates |  |  |

| Bias | 9 | Describe any efforts to address potential sources of bias | Described in sensitivity analyses |  |  |
| --- | --- | --- | --- | --- | --- |
| Study size | 10 | Explain how the study size was arrived at | Described in the study population section of the results |  |  |
| Quantitative  variables | 11 | Explain how quantitative  variables were handled in the analyses. If applicable, describe which groupings were chosen, and why | NA |  |  |
| Statistical  methods | 12 | (a) Describe all statistical  methods, including those used to control for confounding  (b) Describe any methods used to examine subgroups and interactions  (c) Explain how missing data were addressed  (d) *Cohort study*- If applicable, explain how loss to follow-up was addressed  *Case-control study*- If  applicable, explain how  matching of cases and controls was addressed  *Cross-sectional study*- If  applicable, describe analytical methods taking account of sampling strategy  (e) Describe any sensitivity analyses | 6A - Included in statistical analysis section - paragraph 1 and 2  6B - included in sensitivity analyses  6C - Complete case analysis described in paragraph 2 of the statistical analysis  6D - restricted cohort described in the last two sentences of the sensitivity analyses  6E - described in the sensitivity analyses section of methods |  |  |
| Data access and cleaning methods |  | .. |  | RECORD 12.1: Authors should describe the extent to which the investigators had access to the database population used to create the study population. | Discussed in Study design and data source. |
